# Supplementary material for: A scalable method of determining physiological endotypes of sleep apnea from a polysomnographic sleep study
Source: PubMed Central journal article supplement — Sleep. 2020 Sep 15;44(1):zsaa168. doi: 10.1093/sleep/zsaa168 (PMC7819840; doi:10.1093/sleep/zsaa168), 2020-09-15
Supplement: zsaa168_suppl_supplementary_figures2.pdf [file zsaa168_suppl_supplementary_figures2.pdf]

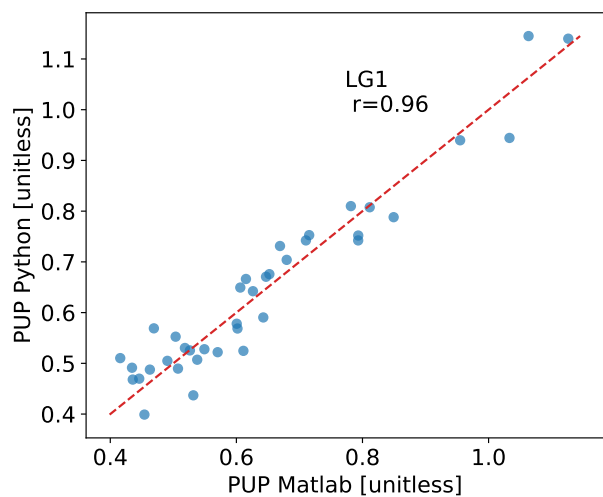

(a) Loop gain at 1 cycle/min

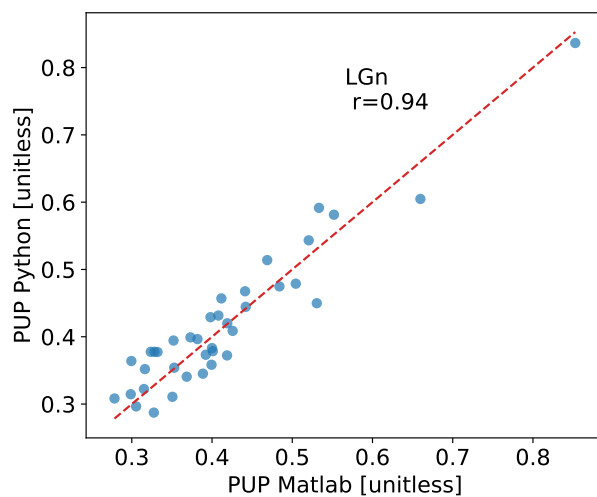

(b) Loop gain at the system's natural frequency  $n$  cycle/min

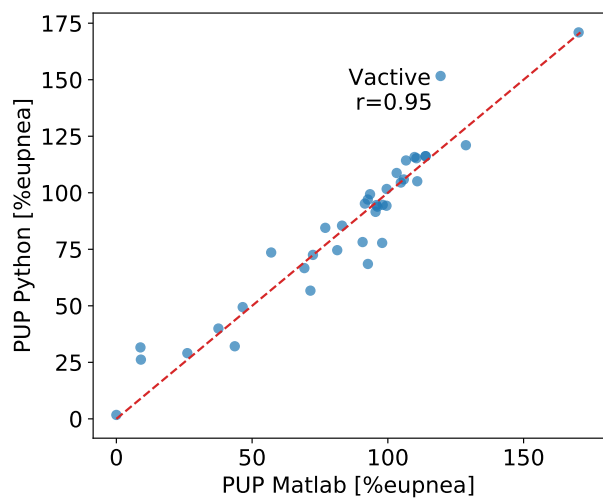

(c)  $V_{active}$

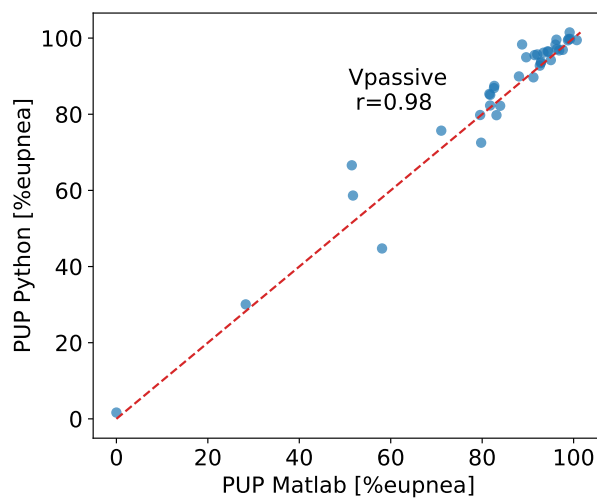

(d)  $V_{passive}$

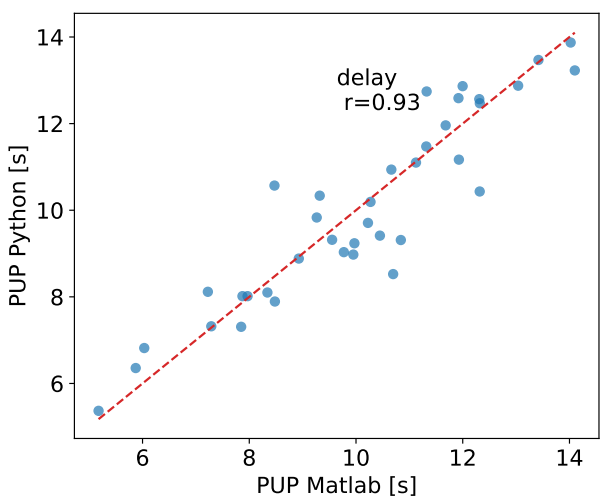

(e) Circulatory delay ( $\delta$ )

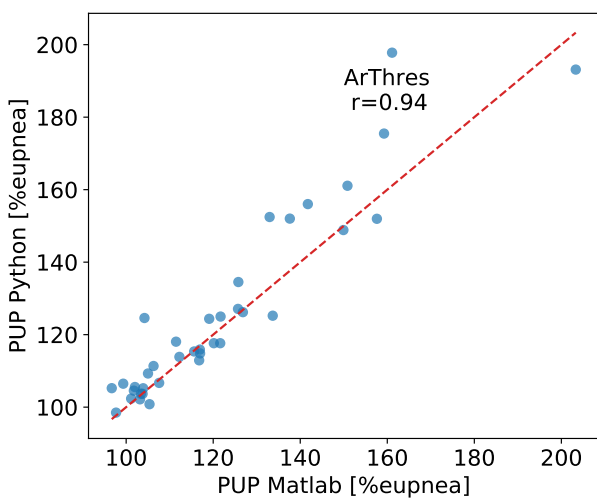

(f) Arousal threshold
