# Supplementary figures and images for: A scalable method of determining physiological endotypes of sleep apnea from a polysomnographic sleep study
Source: PubMed Central journal article supplement — Sleep. 2020 Sep 15;44(1):zsaa168. doi: 10.1093/sleep/zsaa168 (PMC7819840; doi:10.1093/sleep/zsaa168), 2020-09-15

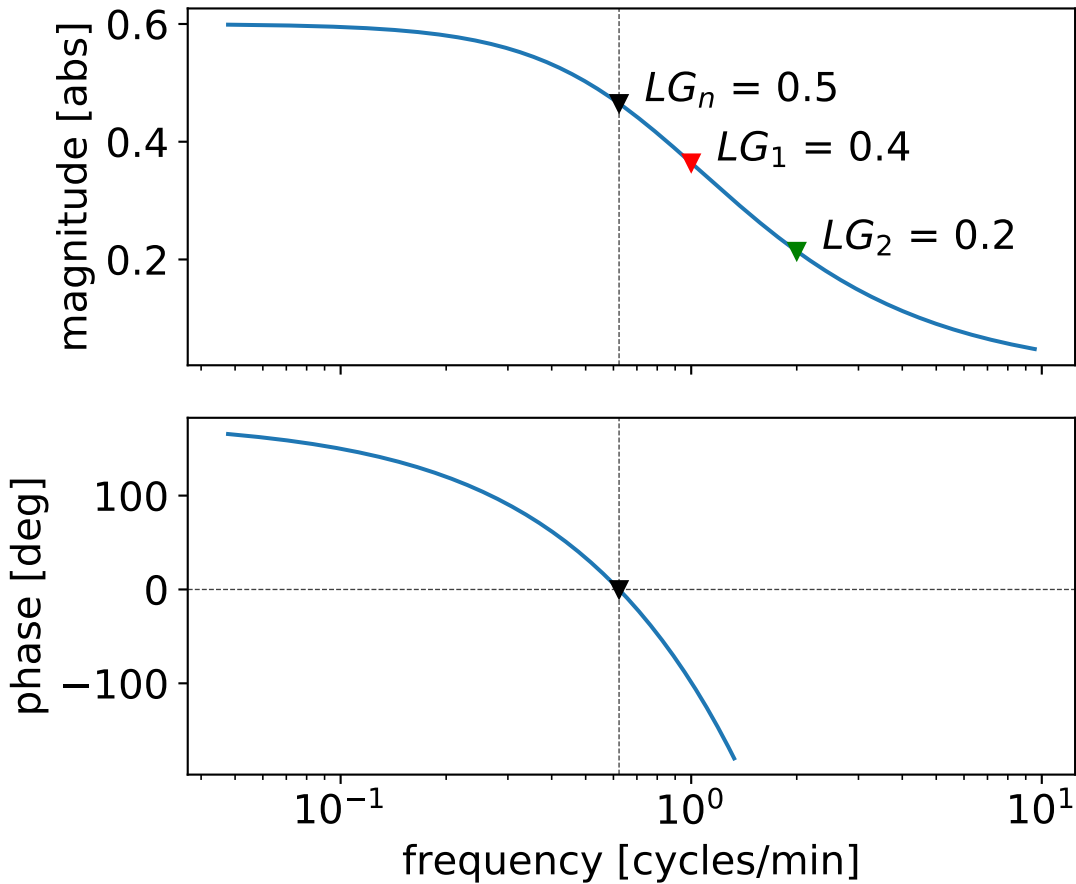

Supplement: zsaa168_suppl_supplementary_figures1.pdf [file zsaa168_suppl_supplementary_figures1.pdf]
